# Supplementary material for: Unveiling photophysical properties of cyclometalated iridium(iii) complexes with azadipyrromethene and dipyrromethene ancillary: a theoretical perspective
Source: Royal Society of Chemistry journal article supplement (doi:10.1039/c4ra07041k), 2014-10-24
Supplement: c4ra07041k1.pdf [file c4ra07041k1.pdf]

## Electronic Supplementary Information

### **Unveiling photophysical properties of cyclometalated iridium(III) complexes with azadipyrromethene and dipyrromethene ancillary: A theoretical perspective**

**Xin-Yao Ren, Yong Wu, Guo-Gang Shan, Li Wang, Yun Geng\* and Zhong-Min Su\***

*Institute of Functional Material Chemistry, Faculty of Chemistry, Northeast Normal  
University, Changchun 130024, People's Republic of China  
E-mail: [gengy575@nenu.edu.cn](mailto:gengy575@nenu.edu.cn); [zmsu@nenu.edu.cn](mailto:zmsu@nenu.edu.cn)*

**Table S1** Main optimized geometry structural parameters of **1** in the ground state obtained by different functional levels with the experimental data.

|          | PBE0   | B3LYP  | TPSSh  | mPW1PW91 | PBEh1PBE | PBE    | Exp. <sup>a</sup> |
|----------|--------|--------|--------|----------|----------|--------|-------------------|
| Ir-C1    | 2.010  | 2.027  | 2.022  | 2.012    | 2.012    | 2.018  | 2.017             |
| Ir-C2    | 2.003  | 2.020  | 2.015  | 2.005    | 2.005    | 2.011  | 2.023             |
| Ir-N1    | 2.064  | 2.091  | 2.072  | 2.066    | 2.068    | 2.072  | 2.041             |
| Ir-N2    | 2.037  | 2.064  | 2.047  | 2.040    | 2.042    | 2.043  | 2.029             |
| Ir-N3    | 2.231  | 2.288  | 2.244  | 2.236    | 2.237    | 2.263  | 2.188             |
| Ir-N4    | 2.209  | 2.264  | 2.216  | 2.213    | 2.215    | 2.23   | 2.183             |
| N3-Ir-N4 | 84.77  | 84.15  | 84.78  | 84.80    | 84.57    | 84.51  | 85.06             |
| C1-Ir-N1 | 79.97  | 79.70  | 79.81  | 79.92    | 79.91    | 79.98  | 80.94             |
| C2-Ir-N2 | 80.21  | 79.97  | 80.05  | 80.15    | 80.14    | 80.29  | 81.09             |
| C3-N5-C4 | 129.89 | 130.89 | 129.67 | 130.03   | 129.93   | 129.86 | 127.95            |

<sup>a</sup> Ref. 32

**Table S2** Absorption spectra of **1** calculated by six different functions with basis sets of LANL2DZ ECP for Ir and 6-31G (d,p) for nonmetal atoms in CHCl<sub>3</sub> media, together with the experimental values.

|                                  | M06 | O3lyp | TPSSh | B3LYP | mPW1PW91 | PBE0 | Exp. <sup>a</sup> |
|----------------------------------|-----|-------|-------|-------|----------|------|-------------------|
|                                  | 541 | 555   | 554   | 532   | 513      | 514  | 579               |
| $\lambda_{\text{abs}}/\text{nm}$ | 409 | 406   | 402   | 414   | 399      | 400  | 403               |
|                                  | 362 | 365   | 371   | 354   | 373      | 374  | 363               |
|                                  | 277 | 307   | 299   | 281   | 269      | 269  | 265               |

<sup>a</sup> Ref. 32

**Table S3** Variations for bond distances (Å), bond angles (°) and dihedral angles (°) between the triplet ( $T_1$ ) and ground states ( $S_0$ ) of all the complexes.

|                           | <b>1</b> | <b>2</b> | <b>3</b> | <b>4</b> |
|---------------------------|----------|----------|----------|----------|
| Bond length               |          |          |          |          |
| Ir-C1                     | -0.008   | -0.002   | 0.001    | 0        |
| Ir-C2                     | -0.002   | -0.002   | -0.003   | 0        |
| Ir-N1                     | 0.003    | 0.002    | -0.001   | 0        |
| Ir-N2                     | 0.009    | -0.002   | -0.002   | -0.001   |
| Ir-N3                     | 0.022    | 0.008    | 0.017    | -0.004   |
| Ir-N4                     | 0.065    | 0.005    | -0.004   | -0.005   |
| Bond angle                |          |          |          |          |
| N3-Ir-N4                  | -0.48    | -0.99    | -1.14    | -1       |
| C1-Ir-N1                  | -0.02    | -0.04    | -0.07    | 0        |
| C2-Ir-N2                  | 0.08     | -0.01    | -0.08    | -0.01    |
| C3-X15-C4 <sup>a</sup>    | -4.12    | -2.39    | -3.15    | -2.97    |
| C1-Ir-N3                  | 4.59     | 0.38     | -0.39    | 0.71     |
| C2-Ir-N4                  | -3.38    | -0.34    | 1.44     | 0.70     |
| Dihedral angle            |          |          |          |          |
| N3-C3-X15-N4 <sup>a</sup> | -45.87   | -3.96    | 5.17     | 0.46     |
| N3-C8-C9-C10              | 71.47    | -6.05    | -20.58   | —        |
| N4-C5-C6-C7               | 31.24    | 17.46    | —        | —        |
| N2-C11-C12-C2             | -1.09    | -1.48    | 0.48     | -0.17    |
| N1-C13-C14-C1             | 1.15     | -0.30    | -0.53    | -0.17    |

<sup>a</sup> X = N (in **1**); X=C (in **2-4**)

**Table S4** Calculated intramolecular centroid-centroid distances (Å) for **1-3** at DFT/PBE0 level of theory

|            | <b>1</b>    | <b>1-exp<sup>a</sup></b> | <b>2</b>    | <b>3</b> |
|------------|-------------|--------------------------|-------------|----------|
| R( $S_0$ ) | 3.661/3.708 | 3.501/3.607              | 3.669/3.688 | 3.605    |
| R( $T_1$ ) | 3.631/3.671 |                          | 3.678/3.745 | 3.638    |

<sup>a</sup> Ref. 32

**Table S5** Molecular orbital compositions (%) in the S<sub>0</sub> State for Ir(III) complexes by DFT/PBE0 level (ppy1 and ppy2 refer to phenylpyridine ligands containing C1 and N1 atoms, C2 and N2 atoms, respectively).

|          | Orbital <sup>a</sup> | Energy(eV) | Compositions (%) |       |       |           |
|----------|----------------------|------------|------------------|-------|-------|-----------|
|          |                      |            | Ir               | ppy1  | ppy2  | ancillary |
| <b>1</b> | L+2                  | -1.28      | 3.75             | 70.22 | 23.68 | 1.48      |
|          | L+1                  | -1.42      | 2.56             | 24.56 | 68.70 | 2.82      |
|          | L                    | -2.49      | 1.18             | 0.41  | 0.46  | 97.79     |
|          | H                    | -5.38      | 0.23             | 0.47  | 0.38  | 98.88     |
|          | H-1                  | -5.41      | 39.95            | 22.21 | 24.27 | 13.20     |
|          | H-2                  | -5.86      | 20.75            | 4.83  | 10.46 | 63.72     |
| <b>2</b> | L+2                  | -1.22      | 3.86             | 63.69 | 29.86 | 1.70      |
|          | L+1                  | -1.35      | 2.47             | 30.86 | 62.37 | 2.93      |
|          | L                    | -2.08      | 1.10             | 0.84  | 0.55  | 97.27     |
|          | H                    | -5.31      | 5.98             | 3.31  | 2.24  | 88.34     |
|          | H-1                  | -5.35      | 35.52            | 19.04 | 24.17 | 20.99     |
|          | H-2                  | -5.83      | 27.02            | 13.75 | 17.66 | 41.28     |
| <b>3</b> | L+2                  | -1.22      | 3.58             | 81.01 | 13.46 | 1.00      |
|          | L+1                  | -1.38      | 2.36             | 13.69 | 81.45 | 1.38      |
|          | L                    | -2.10      | 1.14             | 0.23  | 0.63  | 97.66     |
|          | H                    | -5.36      | 24.94            | 22.03 | 9.08  | 43.64     |
|          | H-1                  | -5.48      | 15.78            | 14.26 | 6.29  | 63.43     |
|          | H-2                  | -5.81      | 28.78            | 8.44  | 5.83  | 56.64     |
| <b>4</b> | L+2                  | -1.32      | 3.36             | 47.14 | 47.92 | 0.75      |
|          | L+1                  | -1.38      | 2.27             | 48.24 | 47.46 | 0.86      |
|          | L                    | -2.14      | 1.08             | 0.37  | 0.34  | 97.59     |
|          | H                    | -5.49      | 40.48            | 27.22 | 27.48 | 4.40      |
|          | H-1                  | -5.52      | 1.31             | 0.43  | 0.36  | 97.88     |
|          | H-2                  | -5.81      | 31.95            | 4.25  | 4.43  | 59.14     |

<sup>a</sup> The orbitals involved in the excitations (H = HOMO and L = LUMO).

**Table S6** Calculated singlet excitation energies (E), wavelengths ( $\lambda_{\text{cal}}$ /nm), oscillator strengths ( $f$ ), dominant contribution and transition characters of **1-4** in  $\text{CHCl}_3$  media at TD-M06 level.

| Complex         | state           | $\lambda_{\text{cal}}/E$ | $f$          | Configuration <sup>a</sup> | Nature       | Exp. <sup>b</sup> (nm) |
|-----------------|-----------------|--------------------------|--------------|----------------------------|--------------|------------------------|
| <b>1</b>        | S <sub>1</sub>  | 653/1.90                 | 0.0166       | H→L (97%)                  | MLCT/LLCT    |                        |
|                 | S <sub>2</sub>  | 541/2.29                 | 0.0805       | H-2→L (79%)                | MLCT/LLCT/IL | 579                    |
|                 | S <sub>3</sub>  | 518/2.39                 | 0.1014       | H-3→L (97%)                | MLCT/ILCT    |                        |
|                 | S <sub>4</sub>  | 508/2.44                 | 0.6973       | H-1→L (81%)                | ILCT         |                        |
|                 | S <sub>7</sub>  | 412/2.98                 | 0.0290       | H-5→L (69%)                | LLCT/ILCT    |                        |
|                 |                 |                          |              | H-7→L (22%)                | MLCT/LLCT/IL |                        |
|                 | S <sub>8</sub>  | 409/3.03                 | 0.0692       | H-6→L (78%)                | MLCT/LLCT/IL | 403                    |
|                 | S <sub>19</sub> | 341/3.63                 | 0.0563       | H-3→L+2(48%)               | MLCT/LLCT    |                        |
| H-2→L+2(17%)    |                 |                          |              | LLCT/ILCT                  |              |                        |
| S <sub>47</sub> | 277/4.48        | 0.1135                   | H-1→L+5(54%) | ILCT                       | 265          |                        |
| <b>2</b>        | S <sub>1</sub>  | 544/2.28                 | 0.0210       | H→L (97%)                  | MLCT/LLCT    |                        |
|                 | S <sub>2</sub>  | 473/2.62                 | 0.3335       | H-1→L (58%)                | ILCT         |                        |
|                 |                 |                          |              | H-2→L (38%)                | MLCT/LLCT/IL |                        |
|                 | S <sub>3</sub>  | 450/2.75                 | 0.4016       | H-2→L (52%)                | MLCT/LLCT/IL |                        |
|                 |                 |                          |              | H-1→L (31%)                | ILCT         |                        |
|                 | S <sub>4</sub>  | 445/2.79                 | 0.1796       | H-3→L (84%)                | MLCT/ILCT    |                        |
|                 | S <sub>9</sub>  | 363/3.41                 | 0.0372       | H-1→L+1(58%)               | LLCT         |                        |
|                 |                 |                          |              | H-2→L+1(25%)               | MLCT/LLCT/IL |                        |
|                 | S <sub>10</sub> | 359/3.46                 | 0.0794       | H-6→L (54%)                | MLCT/LLCT/IL |                        |
|                 |                 |                          |              | H-8→L (17%)                |              |                        |
| S <sub>16</sub> | 342/3.62        | 0.0566                   | H-3→L+2(45%) | MLCT/LLCT                  |              |                        |
|                 |                 |                          | H→L+3(19%)   | MLCT/ILCT                  |              |                        |
| S <sub>37</sub> | 287/4.32        | 0.1202                   | H-5→L+1(24%) | LLCT/ILCT                  |              |                        |
|                 |                 |                          | H-3→L+4(20%) | LLCT                       |              |                        |
| S <sub>39</sub> | 282/4.40        | 0.0554                   | H→L+5(46%)   | MLCT/LLCT                  |              |                        |
| <b>3</b>        | S <sub>1</sub>  | 543/2.28                 | 0.0168       | H→L (96%)                  | MLCT/LLCT    |                        |
|                 | S <sub>2</sub>  | 466/2.66                 | 0.0105       | H-2→L (80%)                | MLCT/ILCT    |                        |
|                 | S <sub>3</sub>  | 453/2.74                 | 0.1513       | H-3→L (76%)                | MLCT/ILCT    |                        |
|                 |                 |                          |              | H-2→L (17%)                | MLCT/ILCT    |                        |
|                 | S <sub>4</sub>  | 440/2.82                 | 0.7448       | H-1→L (88%)                | ILCT         |                        |
|                 | S <sub>5</sub>  | 416/2.98                 | 0.0184       | H→L+1(93%)                 | MLCT/LLCT/IL |                        |
|                 | S <sub>10</sub> | 356/3.49                 | 0.0849       | H-6→L (77%)                | MLCT/LLCT/IL |                        |
|                 | S <sub>11</sub> | 353/3.52                 | 0.0261       | H-2→L+1(52%)               | MLCT/LLCT    |                        |
|                 |                 |                          |              | H-3→L+1(16%)               | MLCT/LLCT    |                        |
|                 | S <sub>15</sub> | 341/3.63                 | 0.0777       | H→L+3(64%)                 | MLCT/LLCT    |                        |
|                 | S <sub>25</sub> | 303/4.09                 | 0.0640       | H-2→L+3(38%)               | MLCT/LLCT    |                        |
|                 |                 |                          |              | H-4→L+2(20%)               | LLCT/ILCT    |                        |
|                 |                 |                          |              | H-3→L+3(31%)               | MLCT/LLCT    |                        |
| S <sub>35</sub> | 286/4.34        | 0.1255                   | H-5→L+2(20%) | LLCT/ILCT                  |              |                        |
|                 |                 |                          | H-4→L+3(19%) | ILCT                       |              |                        |

---

|                 |                 |          |              |              |              |
|-----------------|-----------------|----------|--------------|--------------|--------------|
| 4               | S <sub>2</sub>  | 474/2.62 | 0.0105       | H-6→L+1(19%) | MLCT/LLCT/IL |
|                 | S <sub>3</sub>  | 466/2.66 | 0.1554       | H-3→L (88%)  | MLCT/ILCT    |
|                 | S <sub>4</sub>  | 431/2.87 | 0.6922       | H-2→L (98%)  | MLCT/ILCT    |
|                 | S <sub>5</sub>  | 408/3.04 | 0.0347       | H-1→L (88%)  | ILCT         |
|                 | S <sub>11</sub> | 354/3.50 | 0.0605       | H→L+1(95%)   | MLCT/LLCT/IL |
|                 | S <sub>12</sub> | 348/3.56 | 0.1124       | H-6→L (85%)  | MLCT/LLCT/IL |
|                 |                 |          |              | H-3→L+1(45%) | MLCT/LLCT    |
|                 |                 |          |              | H-2→L+2(44%) |              |
|                 | S <sub>15</sub> | 338/3.66 | 0.0608       | H→L+3(87%)   | MLCT/ILCT    |
|                 | S <sub>27</sub> | 294/4.21 | 0.2017       | H-4→L+2(55%) | LLCT/ILCT    |
|                 |                 |          |              | H-2→L+4(29%) | MLCT/LLCT    |
|                 | S <sub>32</sub> | 282/4.39 | 0.1544       | H-5→L+1(60%) | LLCT/ILCT    |
|                 | S <sub>33</sub> | 281/4.40 | 0.1294       | H-6→L+1(29%) | MLCT/LLCT/IL |
|                 |                 |          |              | H-5→L+2(30%) | LLCT/ILCT    |
| S <sub>44</sub> | 264/4.70        | 0.1366   | H-1→L+5(70%) | ILCT         |              |

---

<sup>a</sup> The orbitals involved in the excitations (H = HOMO and L = LUMO).

<sup>b</sup> Ref. 32

**Table S7** 5d(Ir) orbital compositions (%) in selected occupied orbitals of complexes **2-4** at their  $T_1$  geometries.

|          | Orbital <sup>a</sup> | $d_{xy}$ | $d_{xz}$ | $d_{yz}$ | $d_{x^2-y^2}$ | $d_z^2$ |
|----------|----------------------|----------|----------|----------|---------------|---------|
| <b>2</b> | H                    | 12.12    | 1.66     | 8.31     | 1.59          | 17.64   |
|          | H-1                  |          |          |          |               | 1.13    |
|          | H-2                  |          | 17.92    | 14.08    |               | 11.13   |
|          | H-3                  |          |          |          | 41.65         | 1.50    |
| <b>3</b> | H                    | 12.69    | 2.18     | 8.27     |               | 10.36   |
|          | H-1                  | 4.81     | 3.52     | 3.85     |               |         |
|          | H-2                  | 1.89     | 3.80     |          | 26.37         | 6.08    |
|          | H-3                  |          | 14.00    | 7.40     | 10.40         | 15.58   |
| <b>4</b> | H                    | 10.48    | 5.16     | 10.32    | 2.26          | 15.32   |
|          | H-1                  |          | 1.54     |          |               | 3.87    |
|          | H-2                  | 12.94    |          | 1.14     | 26.78         |         |
|          | H-3                  |          | 22.80    | 2.69     |               | 9.42    |

<sup>a</sup> H and L represent HOMO and LUMO, respectively.

**Table S8** Electronic transitions of **2-4** calculated at the  $T_1$  optimized geometry by TD-B3LYP/TDA in  $CHCl_3$  solution

| Complex  | $S_n/T_m$ | SOC ( $cm^{-1}$ )<br>$\langle T_1   H_{SOC}   S_n \rangle$ | $^{1,3}MLCT$<br>(%) | $E$<br>(eV) | $f$    | Configuration <sup>a</sup> |
|----------|-----------|------------------------------------------------------------|---------------------|-------------|--------|----------------------------|
| <b>2</b> | $T_1$     |                                                            | <1.00               | 1.59        |        | H-1→L (86%)                |
|          | $S_1$     | 23.0                                                       | 37.88               | 1.97        | 0.0174 | H→L (94%)                  |
|          | $S_2$     | 62.8                                                       | 33.27               | 2.43        | 0.1525 | H-2→L (79%)                |
|          | $S_3$     | 60.4                                                       | 34.55               | 2.54        | 0.2897 | H-3→L (82%)                |
| <b>3</b> | $T_1$     |                                                            | 11.98<br>6.64       | 1.60        |        | H→L (37%)<br>H-1→L (60%)   |
|          | $S_1$     | 86.7                                                       | 28.49               | 1.99        | 0.0266 | H→L (88%)                  |
|          | $S_2$     | 113.0                                                      | 20.82<br>13.33      | 2.45        | 0.1071 | H-3→L (45%)<br>H-2→L (36%) |
|          | $S_3$     | 120.0                                                      | 19.62               | 2.52        | 0.1307 | H-2→L (53%)                |
| <b>4</b> | $T_1$     |                                                            | 4.71                | 1.68        |        | H-1→L (87%)                |
|          | $S_1$     | 103.0                                                      | 41.80               | 2.10        | 0.0020 | H→L (96%)                  |
|          | $S_2$     | 71.6                                                       | 28.28               | 2.43        | 0.0220 | H-3→L (81%)                |
|          | $S_3$     | 128.0                                                      | 39.63               | 2.46        | 0.2047 | H-2→L (97%)                |

<sup>a</sup> H and L represent HOMO and LUMO, respectively.

**Table S9** Calculated net spin values located on Ir(III) of  $^3MLCT$  and  $^3MC$  states for **1-4** with PBE0 functional.

| Spin (Ir) | <b>1</b> | <b>2</b> | <b>3</b> | <b>4</b> |
|-----------|----------|----------|----------|----------|
| $^3MLCT$  | 0.023    | 0.005    | 0.012    | 0.015    |

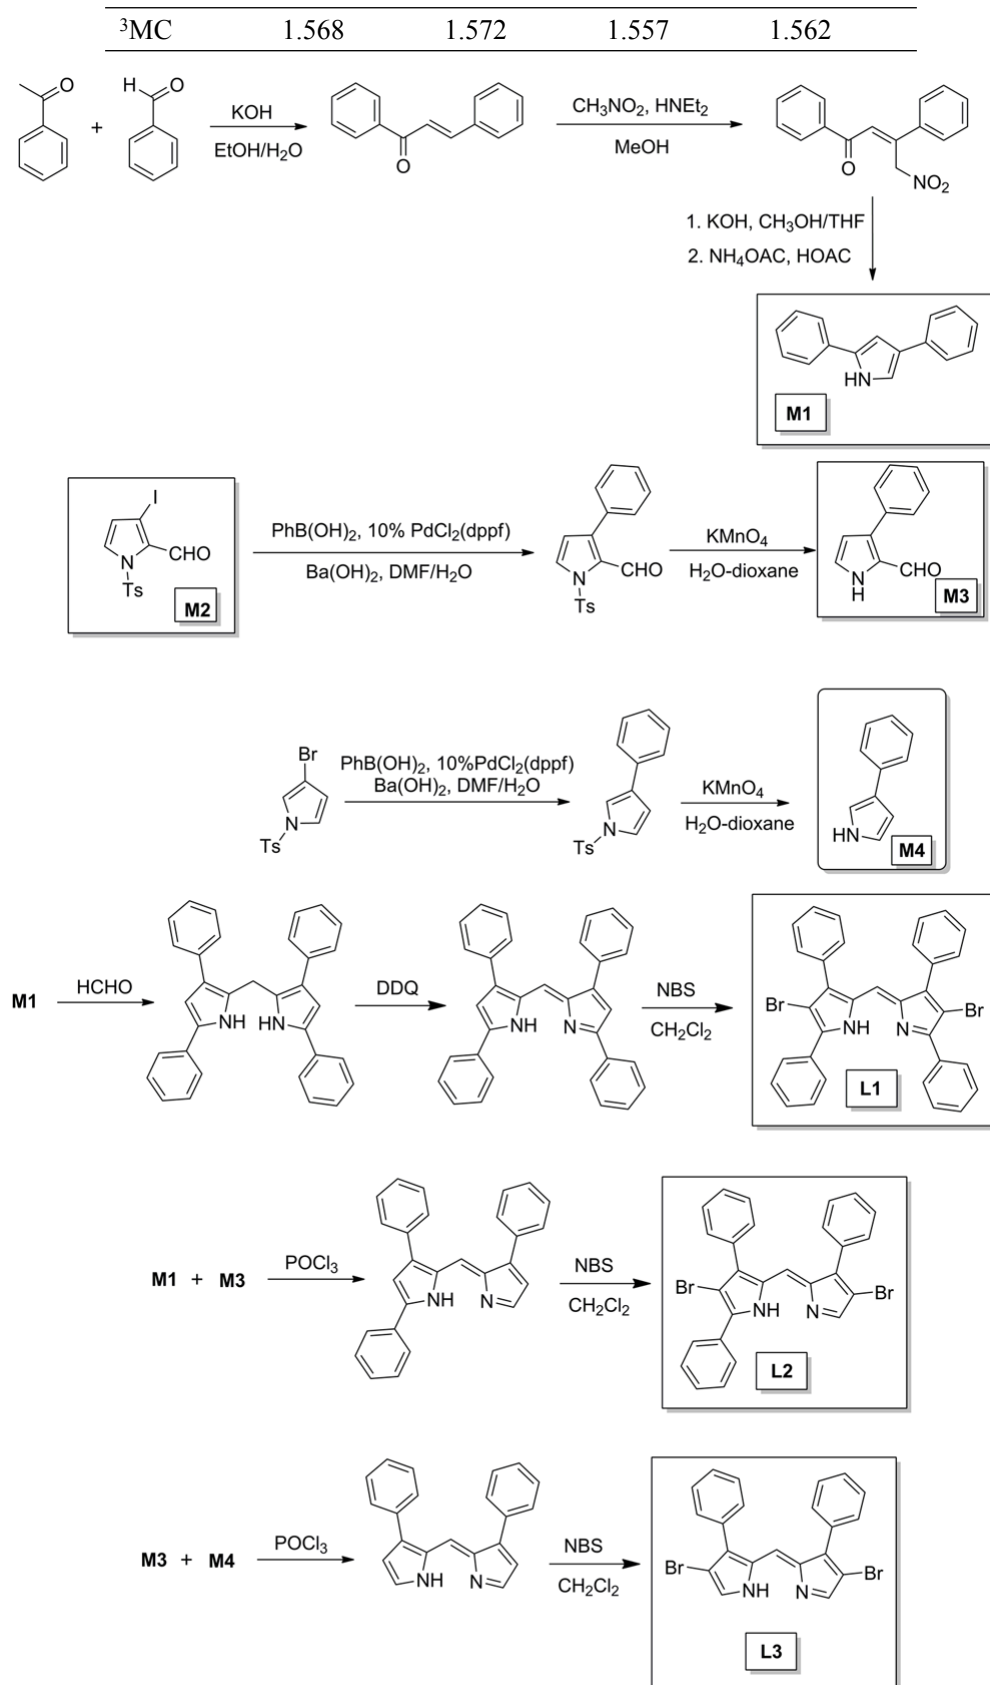

**Fig. S1.** The synthetic routes of the designed ancillary ligands **L1**, **L2** and **L3**.



Fig. S1 depicts the possible synthetic routes of the designed ancillary ligands. As shown in Fig. 1, the intermediates **M1**, **M2**, **M3** and **M4** can be prepared according to the reported literature procedures (*Inorg. Chem.*, 2012, **51**, 7682; *J. Org. Chem.*, 2007, **72**, 2187; *Can. J. Chem.*, 2001, **79**, 1827.). The designed ligands tend to be relatively easy to synthesize *via* condensation of pyrrole derivatives (**M1** and **M4**) and corresponding aldehydes (**M3** and formaldehyde) in different reaction conditions (*Chem. Rev.*, 2007, **107**, 4891; *Chem. Commun.*, 2009, 4515.), followed by bromination with NBS (*J. Org. Chem.*, 2007, **72**, 2187.). Then, the iridium(III) complexes (**2-4**) investigated in this work can be prepared following procedures developed by Thompson or Gray et. al. (*Inorg. Chem.*, 2010, **49**, 6077; *Organometallics*, 2014, **33**, 637).

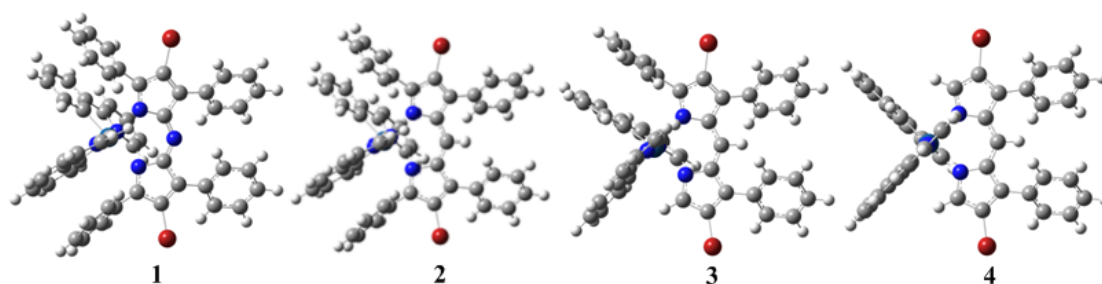

Fig. S2. Optimized structures of **1-4** in the ground states at DFT/PBE0/LANL2DZ level.

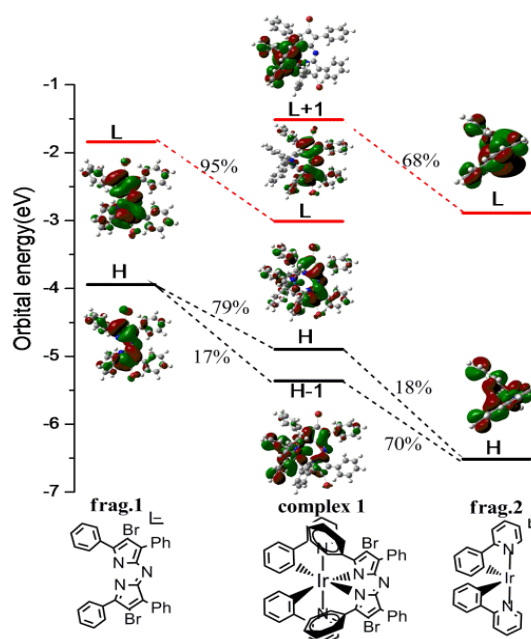

Fig. S3. Orbital interaction diagram for **1**, formed by two fragments at its optimized  $T_1$  geometry.

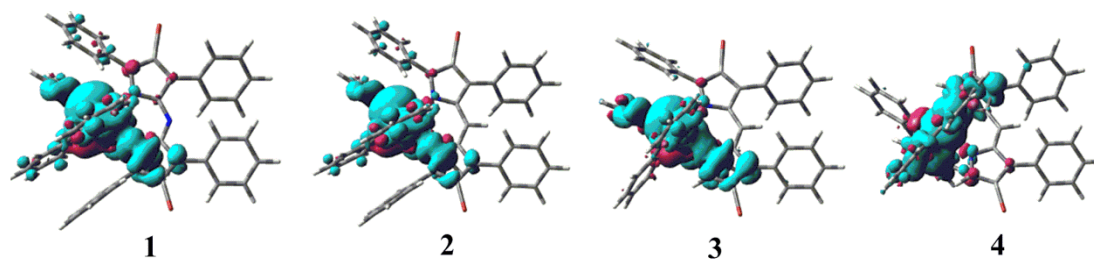

**Fig. S4.** Spin-density distributions (isovalue 0.0004 au) calculated for the  $^3\text{MC}$  states of complexes **1-4**.

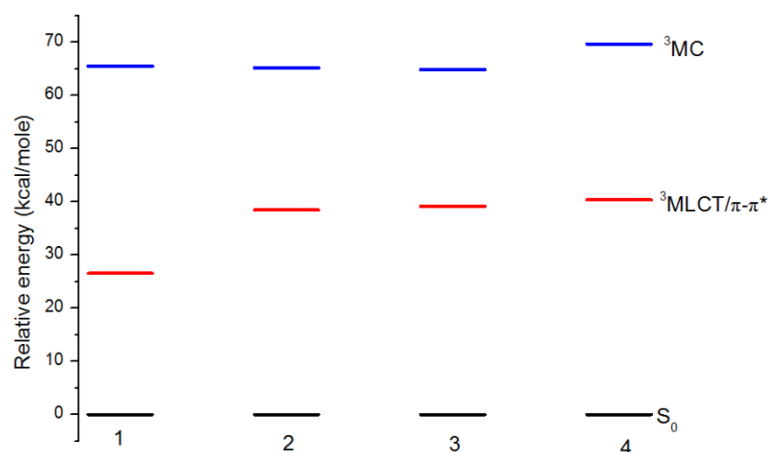

**Fig. S5.** Energy level diagram of  $^3\text{MLCT}/\pi\text{-}\pi^*$  and  $^3\text{MC}$  excited states for **1-4** with the normalized  $S_0$  levels.

**Table S10** Cartesian coordinates of  $[\text{Ir}(\text{ppy})_2(\text{L}_a\text{Br}_2)]$  (**1**) at the  $S_0$  and  $T_1$  optimized geometry.

| $S_0$ |           |           | $T_1$     |    |           |           |           |
|-------|-----------|-----------|-----------|----|-----------|-----------|-----------|
| Ir    | -1.765246 | 8.612352  | 5.371036  | Ir | -1.881668 | 8.530939  | 5.270154  |
| Br    | -0.183596 | 7.103266  | -0.362633 | Br | 1.450435  | 7.718625  | 0.180227  |
| Br    | -0.011788 | 4.837846  | 9.865466  | Br | -1.387703 | 4.457891  | 9.643112  |
| N     | -0.707345 | 7.716445  | 3.622669  | N  | -0.997237 | 7.542986  | 3.449077  |
| N     | -0.393204 | 5.540089  | 4.65458   | N  | -0.498183 | 5.438982  | 4.529641  |
| N     | -0.744766 | 7.03815   | 6.537954  | N  | -0.800386 | 6.885952  | 6.407698  |
| N     | -3.352877 | 7.40812   | 4.83501   | N  | -3.643168 | 7.490145  | 4.978315  |
| N     | -0.333797 | 9.931992  | 5.971659  | N  | -0.284139 | 9.759757  | 5.621732  |
| C     | -0.615314 | 8.112577  | 2.347137  | C  | -0.501456 | 8.138057  | 2.318954  |
| C     | -0.377855 | 6.985936  | 1.494694  | C  | 0.563536  | 7.353293  | 1.785632  |
| C     | -0.313693 | 5.850653  | 2.271781  | C  | 0.690243  | 6.210592  | 2.548169  |
| C     | -0.509469 | 6.336607  | 3.618858  | C  | -0.305811 | 6.371751  | 3.60016   |
| C     | -0.440764 | 5.815173  | 5.939043  | C  | -0.792343 | 5.661886  | 5.79785   |
| C     | -0.18038  | 4.807254  | 6.940095  | C  | -1.080109 | 4.599447  | 6.754957  |
| C     | -0.319703 | 5.482407  | 8.136802  | C  | -1.209105 | 5.264831  | 7.964257  |
| C     | -0.643206 | 6.844284  | 7.857838  | C  | -0.978062 | 6.651517  | 7.748359  |
| C     | -0.066569 | 4.458387  | 1.895692  | C  | 1.565175  | 5.056645  | 2.358838  |
| C     | -0.781233 | 3.418648  | 2.509631  | C  | 1.06657   | 3.75218   | 2.500341  |
| H     | -1.51915  | 3.659181  | 3.266267  | H  | 0.025516  | 3.610526  | 2.768472  |
| C     | -0.549046 | 2.094669  | 2.156086  | C  | 1.893169  | 2.65403   | 2.292786  |
| H     | -1.110991 | 1.303792  | 2.644356  | H  | 1.485644  | 1.65153   | 2.391113  |
| C     | 0.401255  | 1.782228  | 1.187419  | C  | 3.231444  | 2.833659  | 1.950414  |
| H     | 0.580731  | 0.746811  | 0.911418  | H  | 3.875798  | 1.973735  | 1.791162  |
| C     | 1.121351  | 2.805408  | 0.574688  | C  | 3.737911  | 4.123889  | 1.811808  |
| H     | 1.870465  | 2.571036  | -0.17645  | H  | 4.78161   | 4.274387  | 1.550611  |
| C     | 0.890025  | 4.13062   | 0.923121  | C  | 2.913568  | 5.224998  | 2.008792  |
| H     | 1.462561  | 4.920908  | 0.44952   | H  | 3.315814  | 6.227385  | 1.903891  |
| C     | -0.67378  | 9.501024  | 1.858933  | C  | -1.084583 | 9.299695  | 1.653728  |
| C     | -1.62221  | 9.869142  | 0.897713  | C  | -2.442361 | 9.286798  | 1.305794  |
| H     | -2.368556 | 9.147668  | 0.58195   | H  | -3.054752 | 8.444735  | 1.61001   |
| C     | -1.625763 | 11.153107 | 0.367177  | C  | -2.984888 | 10.322696 | 0.557572  |
| H     | -2.378345 | 11.42855  | -0.365656 | H  | -4.03624  | 10.298128 | 0.288872  |
| C     | -0.670938 | 12.082666 | 0.77225   | C  | -2.186694 | 11.395068 | 0.164886  |
| H     | -0.670223 | 13.083562 | 0.349749  | H  | -2.614389 | 12.207246 | -0.416184 |
| C     | 0.286653  | 11.720947 | 1.715161  | C  | -0.839633 | 11.424234 | 0.517547  |
| H     | 1.043452  | 12.435192 | 2.027398  | H  | -0.214748 | 12.260206 | 0.216512  |
| C     | 0.286491  | 10.438359 | 2.252488  | C  | -0.287146 | 10.377408 | 1.245697  |
| H     | 1.05166   | 10.152886 | 2.964402  | H  | 0.766136  | 10.392923 | 1.508024  |
| C     | 0.158867  | 3.405671  | 6.689419  | C  | -1.160218 | 3.17068   | 6.465548  |
| C     | -0.358047 | 2.39215   | 7.511775  | C  | -2.157848 | 2.375347  | 7.052055  |

|   |           |           |           |   |           |           |           |
|---|-----------|-----------|-----------|---|-----------|-----------|-----------|
| H | -1.016511 | 2.655387  | 8.332741  | H | -2.879913 | 2.83354   | 7.720679  |
| C | -0.048147 | 1.058437  | 7.276002  | C | -2.234086 | 1.01534   | 6.777831  |
| H | -0.462571 | 0.289085  | 7.921622  | H | -3.016982 | 0.417916  | 7.236786  |
| C | 0.784683  | 0.708396  | 6.215553  | C | -1.313048 | 0.419586  | 5.918813  |
| H | 1.028077  | -0.334642 | 6.032966  | H | -1.370501 | -0.644759 | 5.708993  |
| C | 1.301934  | 1.704116  | 5.391189  | C | -0.316702 | 1.198028  | 5.334498  |
| H | 1.945853  | 1.443274  | 4.556346  | H | 0.414287  | 0.741038  | 4.672986  |
| C | 0.994436  | 3.039734  | 5.623182  | C | -0.239775 | 2.5601    | 5.599668  |
| H | 1.394765  | 3.809391  | 4.974467  | H | 0.538949  | 3.162056  | 5.145812  |
| C | -0.736902 | 7.879449  | 8.904216  | C | -0.668792 | 7.643609  | 8.772679  |
| C | 0.319254  | 8.775384  | 9.091214  | C | 0.513828  | 8.388478  | 8.642001  |
| H | 1.163612  | 8.755005  | 8.408054  | H | 1.119109  | 8.254961  | 7.750775  |
| C | 0.299775  | 9.672381  | 10.15552  | C | 0.917538  | 9.254733  | 9.649812  |
| H | 1.129374  | 10.360228 | 10.293216 | H | 1.843854  | 9.811828  | 9.540474  |
| C | -0.7741   | 9.683942  | 11.040077 | C | 0.140686  | 9.404031  | 10.79644  |
| H | -0.788954 | 10.383945 | 11.870819 | H | 0.455359  | 10.081817 | 11.585121 |
| C | -1.828411 | 8.791     | 10.861163 | C | -1.042663 | 8.679788  | 10.929042 |
| H | -2.670901 | 8.797616  | 11.54628  | H | -1.659202 | 8.802848  | 11.814636 |
| C | -1.803809 | 7.884929  | 9.808214  | C | -1.441826 | 7.798949  | 9.932419  |
| H | -2.618218 | 7.179698  | 9.675415  | H | -2.366001 | 7.241747  | 10.037967 |
| C | -3.568254 | 6.168598  | 5.303367  | C | -3.882269 | 6.236257  | 5.390992  |
| H | -2.855729 | 5.807742  | 6.03419   | H | -3.077585 | 5.744002  | 5.920119  |
| C | -4.632446 | 5.387017  | 4.889527  | C | -5.085802 | 5.587946  | 5.173799  |
| H | -4.7563   | 4.390545  | 5.297954  | H | -5.213233 | 4.570716  | 5.526161  |
| C | -5.514684 | 5.91214   | 3.947543  | C | -6.096077 | 6.268909  | 4.499895  |
| H | -6.354547 | 5.325671  | 3.587047  | H | -7.052137 | 5.793162  | 4.30265   |
| C | -5.313134 | 7.200091  | 3.484932  | C | -5.863684 | 7.569616  | 4.089458  |
| H | -5.995414 | 7.637455  | 2.765482  | H | -6.634733 | 8.127736  | 3.571258  |
| C | -4.229762 | 7.955215  | 3.948786  | C | -4.631003 | 8.181273  | 4.342942  |
| C | -3.954089 | 9.342532  | 3.609029  | C | -4.282738 | 9.549713  | 3.996923  |
| C | -4.796389 | 10.116384 | 2.797821  | C | -5.182832 | 10.453298 | 3.416279  |
| H | -5.679045 | 9.679491  | 2.337642  | H | -6.202472 | 10.152281 | 3.189107  |
| C | -4.520022 | 11.457971 | 2.595397  | C | -4.781512 | 11.750461 | 3.142687  |
| H | -5.17338  | 12.063963 | 1.97467   | H | -5.477379 | 12.457397 | 2.700699  |
| C | -3.39811  | 12.023363 | 3.206366  | C | -3.474476 | 12.138739 | 3.447351  |
| H | -3.176536 | 13.076738 | 3.054424  | H | -3.151058 | 13.15402  | 3.231595  |
| C | -2.557743 | 11.253001 | 4.001149  | C | -2.581868 | 11.24288  | 4.022966  |
| H | -1.686953 | 11.722454 | 4.44813   | H | -1.572441 | 11.579136 | 4.239304  |
| C | -2.80143  | 9.891569  | 4.218484  | C | -2.956795 | 9.924316  | 4.315036  |
| C | 0.943074  | 9.893173  | 5.56456   | C | 0.878234  | 9.711101  | 4.954378  |
| H | 1.184366  | 9.081452  | 4.887787  | H | 0.958418  | 8.933785  | 4.204502  |
| C | 1.884604  | 10.81782  | 5.981084  | C | 1.915166  | 10.595143 | 5.198326  |
| H | 2.905472  | 10.748189 | 5.622477  | H | 2.834315  | 10.51546  | 4.628948  |
| C | 1.479723  | 11.825757 | 6.856756  | C | 1.738562  | 11.571738 | 6.177028  |

|   |           |           |          |   |           |           |          |
|---|-----------|-----------|----------|---|-----------|-----------|----------|
| H | 2.183733  | 12.581925 | 7.191539 | H | 2.524139  | 12.290929 | 6.389436 |
| C | 0.174965  | 11.834894 | 7.317729 | C | 0.551294  | 11.604574 | 6.88758  |
| H | -0.150998 | 12.582343 | 8.031665 | H | 0.398598  | 12.338553 | 7.670191 |
| C | -0.729853 | 10.855601 | 6.890934 | C | -0.459759 | 10.67704  | 6.614336 |
| C | -2.083332 | 10.65945  | 7.386272 | C | -1.71912  | 10.550992 | 7.333335 |
| C | -2.684838 | 11.478498 | 8.34922  | C | -2.088312 | 11.369793 | 8.406999 |
| H | -2.164399 | 12.349484 | 8.739139 | H | -1.443347 | 12.181035 | 8.734461 |
| C | -3.955551 | 11.180155 | 8.81538  | C | -3.286801 | 11.146988 | 9.067406 |
| H | -4.428558 | 11.814782 | 9.55875  | H | -3.578774 | 11.782354 | 9.898174 |
| C | -4.618418 | 10.055711 | 8.319718 | C | -4.110094 | 10.097817 | 8.655904 |
| H | -5.616059 | 9.817825  | 8.681704 | H | -5.050691 | 9.918349  | 9.171502 |
| C | -4.022824 | 9.241975  | 7.360839 | C | -3.743391 | 9.282731  | 7.589116 |
| H | -4.573339 | 8.383906  | 6.984756 | H | -4.40946  | 8.47898   | 7.288146 |
| C | -2.743096 | 9.519001  | 6.865097 | C | -2.543101 | 9.486762  | 6.899092 |
